# Supplementary material for: Chromium containing zinc oxide materials from organobimetallic precursors
Source: Royal Society of Chemistry journal article supplement (doi:10.1039/b916253b), 2010-01-01

## **SUPPORTING INFORMATION**

**SI-1:** Further analytical data for compound  $[\text{MeZnOCH}_2\text{PhCr}(\text{CO})_3]_4$  (**4**):

$^1\text{H}$ -NMR in comparison to the starting compound (**3**):

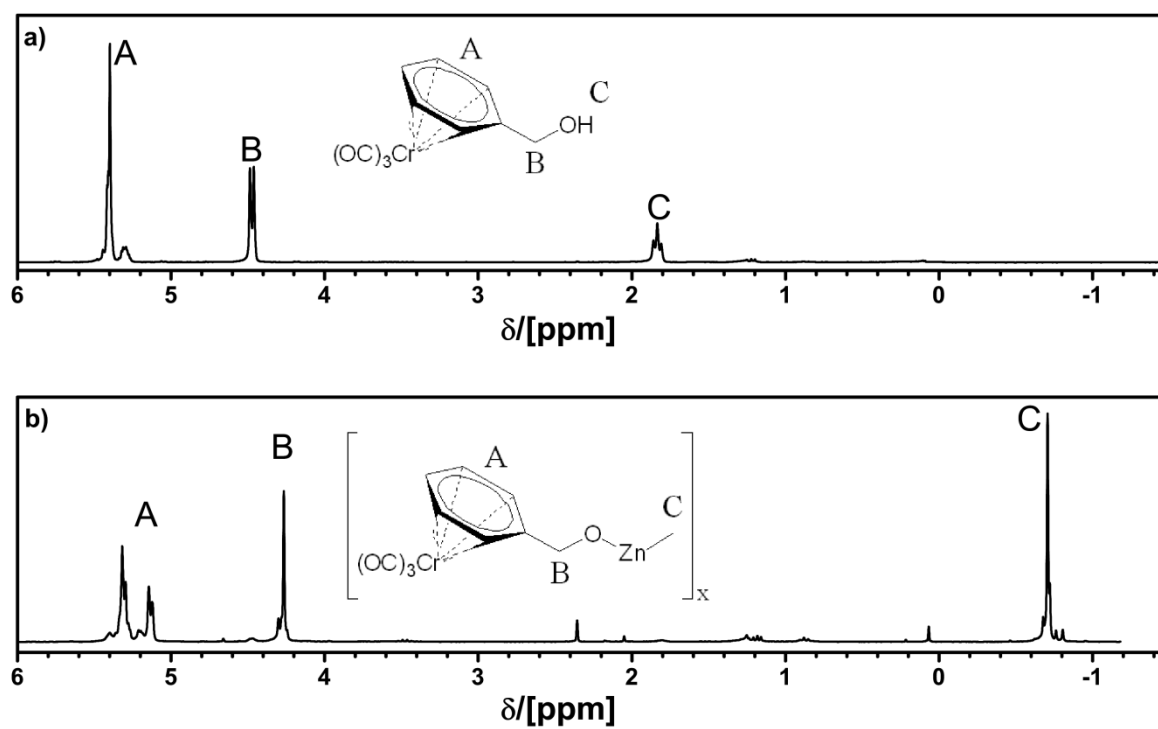

**SI-2: TGA data of compounds (2), (3)**

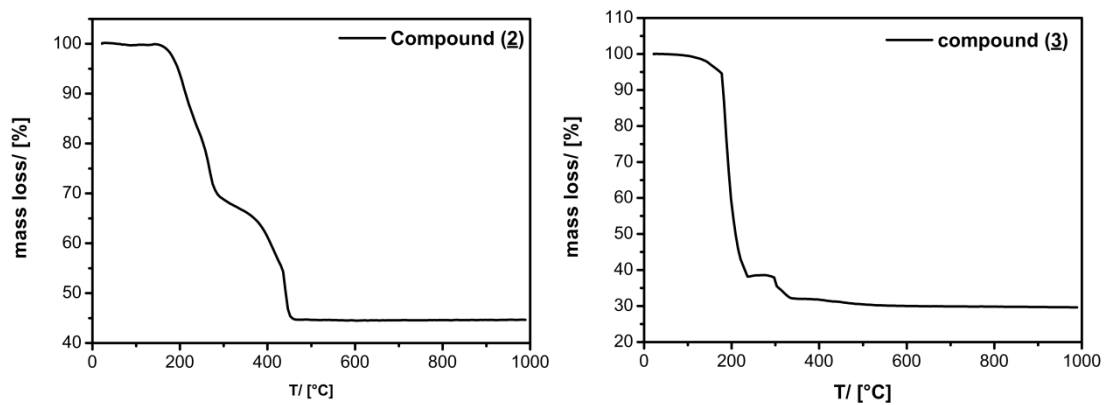

and (6).

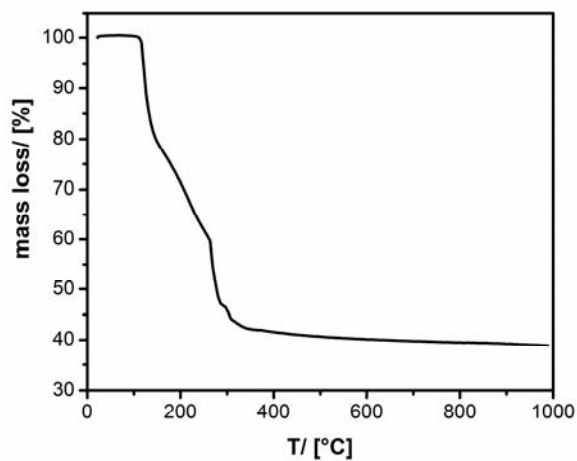

**SI-3:** PXRD pattern of the final product of the thermal decomposition of precursor (**4**).

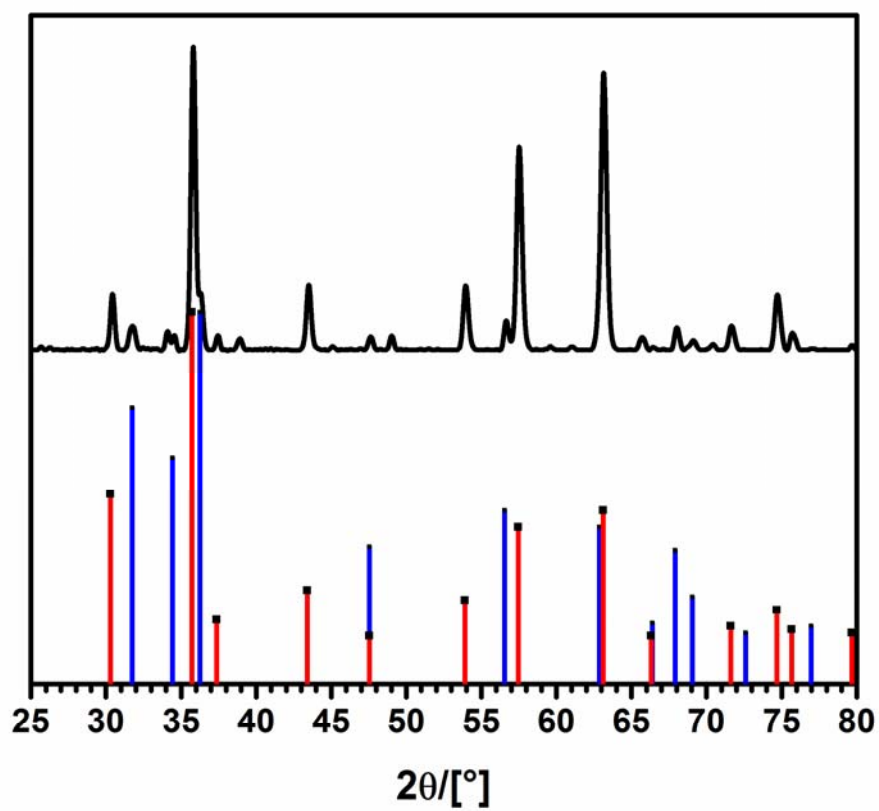

Black line: Experimental pattern.

Blue bars: Pattern of ZnO as a reference.

Red bars: Pattern of  $\text{ZnCr}_2\text{O}_4$  as a reference.

**SI-4:** Photographic images of the Chromium-doped ZnO materials.

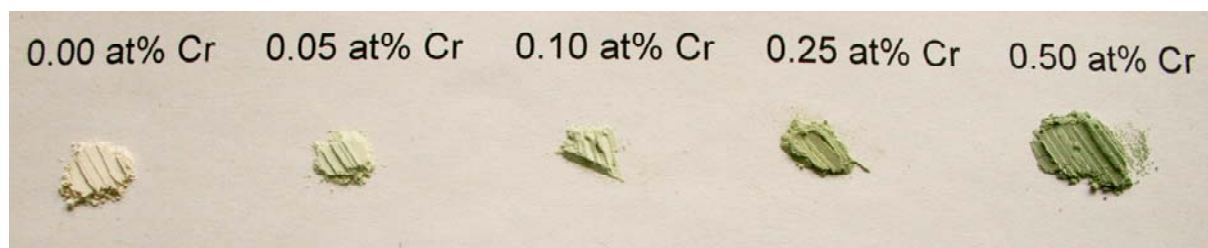

**SI-5:** n-type doping of ZnO due to  $\text{Cr}^{\text{III}}$  centers.

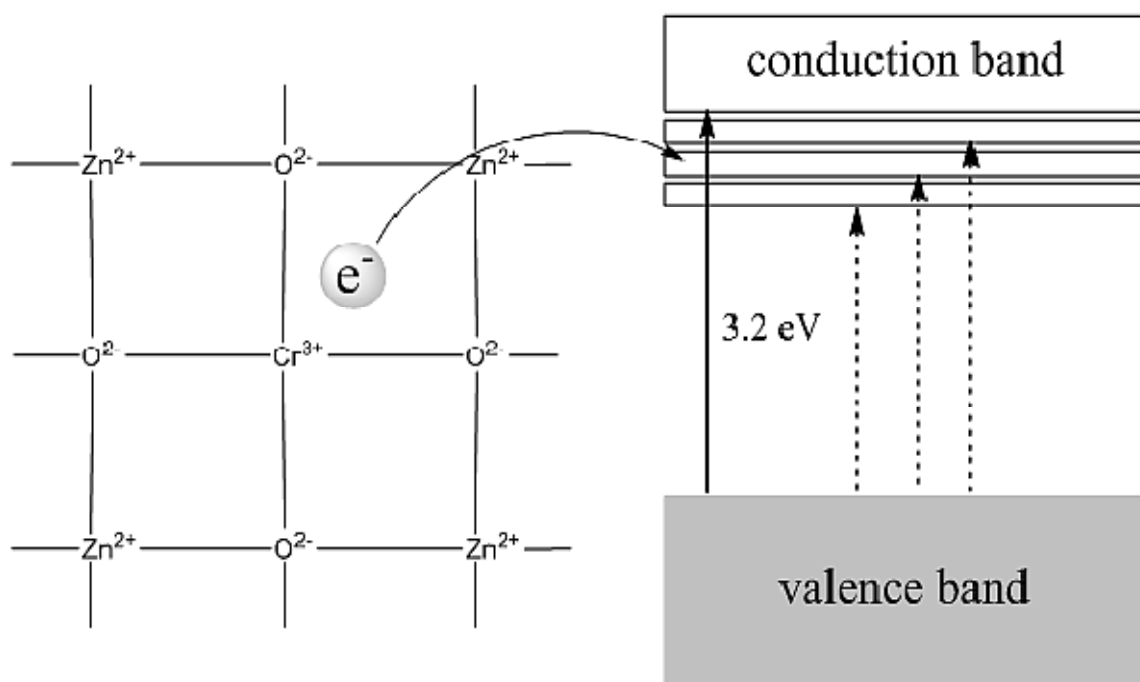

Supplement: b916253b.pdf [file b916253b.pdf]
